# Supplementary material for: Comparison of the Fecal Microbiota of Horses with Intestinal Disease and Their Healthy Counterparts
Source: MDPI journal article supplement (doi:10.3390/vetsci8060113), 2021-06-17
Supplement: s1 [file s1]

# Comparison of the Fecal Microbiota of Horses with Intestinal Disease and Their Healthy Counterparts

Taemook Park, Heetae Cheong, Jungcho Yoon, Ahram Kim, Youngmin Yun and Tatsuya Unno

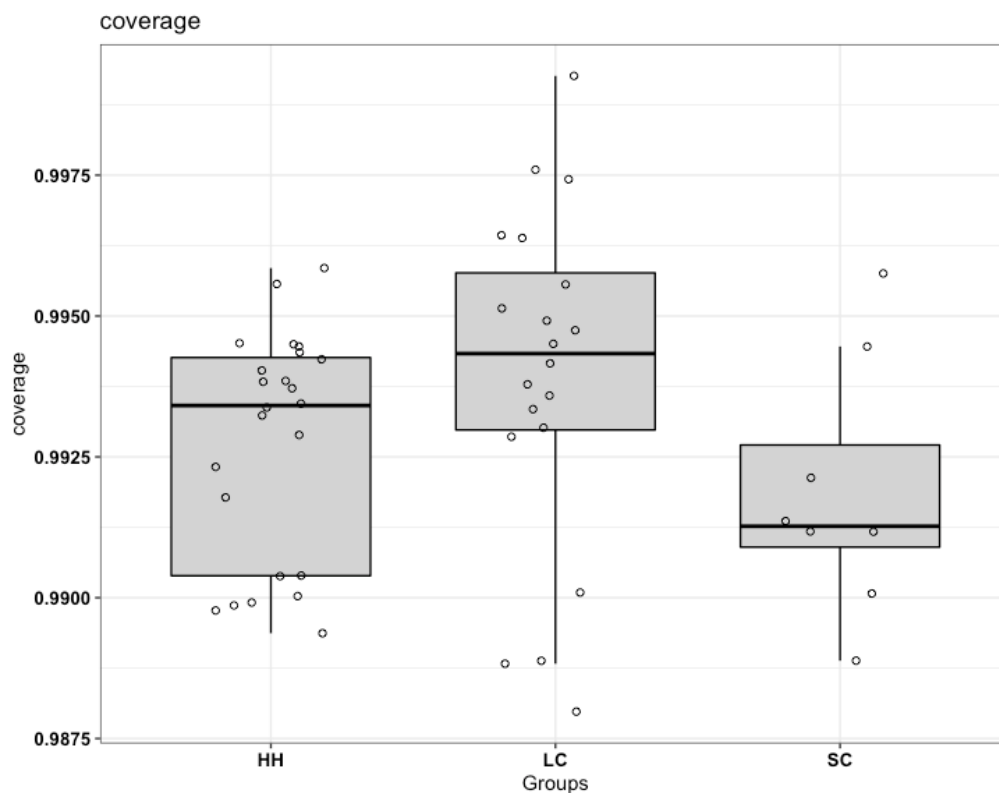

**Figure S1.** Good's coverage obtained for each horse fecal sample in this study.
